# Supplementary material
Source: PubMed Central journal article supplement (PMC3841015)
Supplement: NIHMS527463-supplement-02.pdf [file NIHMS527463-supplement-02.pdf]

## SUPPLEMENTAL FIGURE 2

### Mammalian 1810019J16Rik (Kdf1) protein alignment

|              |     |                                                                 |
|--------------|-----|-----------------------------------------------------------------|
| M_musculus   | 1   | MPRPGQPRPSSGPPRLGPWERPSELCLLETNDERSQPPPGRRTRKPDPKDPGHHGPESITF   |
| H_sapiens    | 1   | MPRPGHPRPAGSPRLGPWERPTELCLLETYDKPPQPPPSRRTRRPDPKDPGHHGPESITF    |
| R_norvegicus | 1   | MPRPGQPRPSSGPPRLGPWERPTELCLLETNDERSQPPPGRRTRRPDPKDPGHHGPESITF   |
| C_familiaris | 1   | MPRPGHPRPSSGPPRLGPWEQPTTELCLLETDEPSQPPPSRRTRRPDPKDPGHHGPESITF   |
| E_caballus   | 1   | MPRPGHPRPSSGPPRLGPWERPAELCLLETYDEPSQPPPSRRTRRPDPKDPGHHGPESITF   |
| B_taurus     | 1   | MPRPGHPRPSSGPPRLGPWERPAELCLLETYDEQARAPPSSRRTRRPDPKDPGHHGPESITF  |
|              |     |                                                                 |
| M_musculus   | 61  | ISGSAEPANEPPTCCLLWRPWGWDWCRAAFCFRRCRDCLQRCGACVRGCSPCLSAGDPIE    |
| H_sapiens    | 61  | ISGSAEPALLESPTCCLLWRPWVWVWCRAAFCFRRCRDCLQRCGACVRGCSPCLSTEDSTE   |
| R_norvegicus | 61  | ISGSAEPANEPPTCCLLWRPWGWDWCRAAFCFRRCRDCLQRCGACVRS CSPCLSAGDPIE   |
| C_familiaris | 61  | ISGSAESAAEPPACCLLWRPWVVDWCRAALCFRRCRSLQRCGACMRGCSPCLSAGDSPE     |
| E_caballus   | 61  | ISGSAEPAAEPPACCLLWRPWVVDWCRAAFCFRHCRGCLQRCGACVRGCSPCLSAGDSPE    |
| B_taurus     | 61  | ISGSAEQTPEPPACCLLWRPWVVDWCRAAFCFRRCWDCLQRCGACARGCSPCLSSGDSPE    |
|              |     |                                                                 |
| M_musculus   | 121 | GSAAEA WAKEHNGVPPSPDRAPPSRRDQORLKTSMGSSFSYPDVKLKGI PVYPYRHATSP  |
| H_sapiens    | 121 | GTAEANWAKEHNGVPPSPDRAPPSRRDQORLKTSMGSSFSYPDVKLKGI PVYPYPRATSP   |
| R_norvegicus | 121 | GSSEAA WAKEHNGVPPSPDRAPPSRRDQORLKTSMGSSFSYPDVKLKGI PVYPYRHATSP  |
| C_familiaris | 121 | GAAEANWAKEHNGVPPSPDRAPPSRRDQORLKTSMGSSFSYPDVKLKGI PVYPYRSATSP   |
| E_caballus   | 121 | GAAEAS WAKEHNGVPPSPDHAPPSRRDQORLKTSMGSSFSYPDVKLKGI PVYRYRPATSP  |
| B_taurus     | 121 | GAAEANWVKEHNGVPPSPDHAPPSRRDQORLKTSMGSSFSYPDVKLKGI PVYPYRSTTSP   |
|              |     |                                                                 |
| M_musculus   | 181 | VPDV DSCCKEPLAEPPPTRHSLPSTFTNSPRGSEEYYSFHESDLDLPEMGSGSMSREID    |
| H_sapiens    | 181 | APDADSCCKEPLADPPPMRHS LPSTFASSPRGSEEYYSFHESDLDLPEMGSGSMSREID    |
| R_norvegicus | 181 | VPDADSCCKEPLADPPPTRHSLPSTFTSSPRGSEEYYSFHESDLDLPEMGSGSMSREID     |
| C_familiaris | 181 | APDADSCCKEPLAEPPPTRHSLPSTLASSPRGSEEYYSFHESDLDLPEIGSGSMSREID     |
| E_caballus   | 181 | APDV DSCCKEPLAEPPPTRHSLPSTLASSPRGSEEYYSFHESDLDLPEIGSGSMSREID    |
| B_taurus     | 181 | APDADSCCKEPLADPPPMRHS LPSTLASSPRGSEEYYSFHESDLDLPEIGSGSMSREID    |
|              |     |                                                                 |
| M_musculus   | 241 | VLIFFKKLTELFSVHQIDELAKCTS DTVFLEKTSKISDLISSITQDYHLDEQDAEGR LVRG |
| H_sapiens    | 241 | VLIFFKKLTELFSVHQIDELAKCTS DTVFLEKTSKISDLISSITQDYHLDEQDAEGR LVRG |
| R_norvegicus | 241 | VLIFFKKLTELFSVHQIDELAKCTS DTVFLEKTSKISDLISSITQDYHLDEQDAEGR LVRG |
| C_familiaris | 241 | VLIFFKKLTELFSVHQIDELAKCTS DTVFLEKTSKISDLISSITQDYHLDEQDAEGR LVRG |
| E_caballus   | 241 | VLIFFKKLTELFSVHQIDELAKCTS DTVFLEKTSKISDLISSITQDYHLDEQDAEGR LVRG |
| B_taurus     | 241 | VLIFFKKLTELFSVHQIDELAKCTS DTVFLEKTSKISDLISSITQDYHLDEQDAEGR LVRG |
|              |     |                                                                 |
| M_musculus   | 301 | IIRISTRKSRSRPQTS EGRSARSTAPAAAPDSGHETMVGSGLSQDELTVQISQETTADA    |
| H_sapiens    | 301 | IIRISTRKSRARPQTS EGRSIRAAAPTAAAPDSGHETMVGSGLSQDELTVQISQETTADA   |
| R_norvegicus | 301 | IIRISTRKSRSRPQTS EGRSARSTAPAAAPDSGHETMVGSGLSQDELTVQISQETTADA    |
| C_familiaris | 301 | IIRISTRKSRARPQTS EGRSMRGAAPAAAPDSGHETMVGSGLSQDELTVQISQETTADA    |
| E_caballus   | 301 | IIRISTRKSRTRPQTS EGRSIRAAASAAAAPDSGHETMVGSGLSQDELTVQISQETTADA   |
| B_taurus     | 301 | IIRISTRKSRARPQTS EGRSIRAAAPAAAAPDSGHETMVGSGLSQDELTVQISQETTADA   |
|              |     |                                                                 |
| M_musculus   | 360 | IARKLRPYGAPGYPASQDSS FQGTDTDSSGAPLLQVYC                         |
| H_sapiens    | 361 | IARKLRPYGAPGYPASHDSS FQGTDTDSSGAPLLQVYC                         |
| R_norvegicus | 360 | IARKLRPYGAPGYPASQDSS FQGTDTDSSGAPLLQVYC                         |
| C_familiaris | 360 | IARKLRPYGAPGYPASHDSS FQGTDTDSSGAPLLQVYC                         |
| E_caballus   | 361 | IARKLRPYGAPGYPITSHDSS FQGTDTDSSGAPLLQVYC                        |
| B_taurus     | 361 | IARKLRPYGAPGYPASHDSS FQGTDTDSSGAPLLQVYC                         |
